# Supplementary material for: Grandchild caregiving and social activity participation among urban grandparents in China: are migrants disadvantaged compared to locals?
Source: Research Square preprint supplement (doi:10.21203/rs.3.rs-6140336/v1), 2025-05-13
Supplement: Supplementary file 1 [file 711efcef87500496994c87ef.docx]

**Table S1. Descriptive statistics of analytic sample further categorized by hukou status**

| Variables | Migrants | | | Locals | | |
| --- | --- | --- | --- | --- | --- | --- |
|  | Non-caregiver | Caregiver | p Value | Non-caregiver | Caregiver | p Value |
|  | %/M (SD) | %/M (SD) |  | %/M (SD) | %/M (SD) |  |
| ***Dependent variables*** |  |  |  |  |  |  |
| At least one activity | 41.70% | 51.99% | < 0.01 | 62.28% | 66.28% | < 0.05 |
| Number of activities | 0.62 (0.89) | 0.75 (0.87) | < 0.05 | 1.01 (1.01) | 1.06 (1.02) | 0.138 |
| Frequency of activities | 0.91 (1.22) | 1.17 (1.29) | < 0.01 | 1.50 (1.33) | 1.53 (1.28) | 0.649 |
| ***Independent variables*** |  |  |  |  |  |  |
| Grandchild-care intensity |  |  |  |  |  |  |
| No care | - | - | - | - | - | - |
| Moderate care | - | 49.69% | - | - | 59.56% | - |
| Intensive care |  | 50.31% | - | - | 40.44% | - |
| ***Individual characteristics*** |  |  |  |  |  |  |
| Female | 59.01% | 63.73% | 0.195 | 51.30% | 55.39% | < 0.05 |
| Married | 81.98% | 88.05% | < 0.01 | 82.72% | 89.17% | < 0.01 |
| Age | 61.31 (7.45) | 59.98 (5.72) | < 0.05 | 65.35 (7.36) | 62.11 (6.22) | < 0.01 |
| Education |  |  |  |  |  |  |
| Illiterate | 26.50% | 21.80% | 0.140 | 9.20% | 7.01% | < 0.05 |
| Primary school | 41.70% | 47.17% | 0.143 | 30.80% | 30.53% | 0.866 |
| Junior school | 23.68% | 22.85% | 0.795 | 28.46% | 31.34% | < 0.10 |
| Senior middle school and above | 8.13% | 8.18% | 0.981 | 31.54% | 31.11% | 0.788 |
| Employed | 57.60% | 54.09% | 0.347 | 26.24% | 25.20% | 0.495 |
| Pension enrollment | 72.79% | 72.12% | 0.841 | 87.16% | 89.92% | < 0.05 |
| IADL | 0.37 (1.00) | 0.24 (0.68) | < 0.05 | 0.32 (0.87) | 0.23 (0.74) | < 0.01 |
| Self-rated health | 3.00 (0.91) | 3.11 (0.90) | 0.110 | 3.09 (0.89) | 3.13 (0.86) | 0.123 |
| CESD score | 8.20 (6.28) | 7.06 (5.58) | < 0.01 | 6.79 (5.81) | 6.41 (5.35) | < 0.05 |
| ***Household characteristics*** |  |  |  |  |  |  |
| Household size | 4.35 (1.42) | 4.81 (1.67) | < 0.01 | 2.69 (1.34) | 3.53 (1.65) | < 0.01 |
| Number of adult children | 2.87 (1.24) | 2.60 (1.17) | < 0.01 | 2.52 (1.27) | 2.04 (1.05) | < 0.05 |
| Household Income (1,000 CNY) | 61.33 (216.13) | 68.40 (107.82) | 0.549 | 62.01 (73.27) | 74.55 (88.51) | < 0.01 |
| Living arrangement |  |  |  |  |  |  |
| Alone or with spouse | - | - | - | 63.46% | 38.36% | < 0.01 |
| With adult children, not grandchildren | 62.90% | 39.20% | < 0.01 | 24.26% | 19.41% | < 0.01 |
| With adult children and grandchildren | 37.10% | 60.80% | < 0.01 | 10.74% | 30.07% | < 0.01 |
| With grandchildren, not adult children | - | - | - | 1.54% | 12.17% | < 0.01 |
| N | 283 | 477 | - | 1,620 | 1,726 | - |

*Note*: M = mean; SD = standard deviation. P value from the t-test for continuous variables and χ2 test for categorical variables between caregivers and non-caregivers.

**Table S2. The effects of grandchild caregiving on social activity participation**

| Variables | At least one activity | | Number of types of activities | | Frequency of participation | |
| --- | --- | --- | --- | --- | --- | --- |
|  | Model 1 | Model 2 | Model 3 | Model 4 | Model 5 | Model 6 |
| Any care | 0.006 (0.020) |  | 0.067* (0.036) |  | 0.059 (0.053) |  |
| Moderate care |  | 0.013 (0.021) |  | 0.072* (0.039) |  | 0.066 (0.057) |
| Intensive care |  | -0.008 (0.025) |  | 0.057 (0.045) |  | 0.046 (0.066) |
| ***Individual characteristics*** |  |  |  |  |  |  |
| Age | 0.001 (0.010) | 0.001 (0.010) | 0.002 (0.017) | 0.002 (0.017) | -0.007 (0.025) | -0.007 (0.025) |
| Married | -0.053 (0.048) | -0.053 (0.048) | -0.097 (0.080) | -0.097 (0.080) | -0.307** (0.125) | -0.306** (0.125) |
| Education (ref: Illiterate) |  |  |  |  |  |  |
| Primary school | 0.005 (0.076) | 0.008 (0.076) | 0.131 (0.161) | 0.133 (0.161) | 0.132 (0.198) | 0.134 (0.198) |
| Middle school | 0.029 (0.090) | 0.031 (0.089) | 0.136 (0.185) | 0.137 (0.186) | 0.095 (0.225) | 0.097 (0.224) |
| High school and above | -0.031 (0.100) | -0.030 (0.100) | 0.015 (0.226) | 0.016 (0.226) | -0.158 (0.249) | -0.157 (0.249) |
| Worked | 0.008 (0.023) | 0.006 (0.023) | 0.060 (0.049) | 0.058 (0.049) | 0.010 (0.062) | 0.008 (0.063) |
| Pension enrollment | -0.049* (0.028) | -0.048* (0.028) | -0.062 (0.051) | -0.062 (0.051) | -0.125* (0.074) | -0.125* (0.074) |
| IADL | -0.043*** (0.012) | -0.043*** (0.012) | -0.053*** (0.019) | -0.053*** (0.019) | -0.074** (0.030) | -0.074** (0.030) |
| Self-rated health | 0.005 (0.012) | 0.005 (0.012) | 0.024 (0.020) | 0.025 (0.020) | 0.016 (0.030) | 0.017 (0.030) |
| CESD score | -0.003* (0.002) | -0.003* (0.002) | -0.004 (0.003) | -0.004 (0.003) | -0.013*** (0.005) | -0.013*** (0.005) |
| ***Household characteristics*** | | | | | | |
| Household size | 0.011 (0.010) | 0.011 (0.010) | 0.005 (0.018) | 0.005 (0.018) | 0.021 (0.026) | 0.021 (0.026) |
| Number of adult children | 0.017 (0.017) | 0.016 (0.017) | 0.019 (0.028) | 0.019 (0.028) | 0.033 (0.049) | 0.032 (0.049) |
| Log household Income | 0.015*** (0.005) | 0.015*** (0.005) | 0.020** (0.008) | 0.020** (0.008) | 0.027** (0.012) | 0.027** (0.012) |
| Living arrangement (ref: Alone or with spouse) | | | | | | |
| With adult children, not grandchildren | -0.041 (0.027) | -0.041 (0.027) | 0.005 (0.049) | 0.005 (0.049) | -0.038 (0.072) | -0.038 (0.072) |
| With adult children and grandchildren | -0.061 (0.042) | -0.060 (0.042) | -0.025 (0.077) | -0.024 (0.077) | -0.077 (0.111) | -0.076 (0.111) |
| With grandchildren, not adult children | -0.031 (0.046) | -0.030 (0.047) | -0.025 (0.088) | -0.025 (0.088) | -0.019 (0.123) | -0.018 (0.123) |
| Constant | 0.411 (0.637) | 0.415 (0.638) | 0.394 (1.055) | 0.397 (1.056) | 1.673 (1.554) | 1.676 (1.555) |
| Baseline SAP × Time trend | Yes | Yes | Yes | Yes | Yes | Yes |
| Community dummy variables × Time trend | Yes | Yes | Yes | Yes | Yes | Yes |
| Year FE | Yes | Yes | Yes | Yes | Yes | Yes |
| Individual FE | Yes | Yes | Yes | Yes | Yes | Yes |
| Community FE | Yes | Yes | Yes | Yes | Yes | Yes |
| N | 6,661 | 6,661 | 6,661 | 6,661 | 6,661 | 6,661 |

*Note*: Results are combined using 5 imputed data sets. Coefficients with standard errors clustered at the household-level shown in parentheses. We set no care as the reference group of moderate care and intensive care and apply it in all tables below.

*p < 0.1; **p < 0.05; ***p< 0.01

**Table S3. The migration-based heterogeneous effects of grandchild caregiving on social activity participation**

| Variables | Non-migrants | Migrants | Non-migrants | Migrants |
| --- | --- | --- | --- | --- |
|  | Model1 | Model2 | Model3 | Model4 |
|  | *Panel A*: *At least one activity* | | | |
| Any care | 0.009 (0.022) | -0.024 (0.059) |  |  |
| Moderate care |  |  | 0.014 (0.023) | -0.015 (0.060) |
| Intensive care |  |  | -0.002 (0.029) | -0.039 (0.071) |
|  | *Panel B*: *Number of types of activities* | | | |
| Any care | 0.080** (0.040) | -0.048 (0.088) |  |  |
| Moderate care |  |  | 0.083* (0.043) | -0.032 (0.097) |
| Intensive care |  |  | 0.074 (0.052) | -0.076 (0.094) |
|  | *Panel C*: *Frequency of participation* | | | |
| Any care | 0.066 (0.060) | 0.023 (0.128) |  |  |
| Moderate care |  |  | 0.060 (0.063) | 0.076 (0.143) |
| Intensive care |  |  | 0.078 (0.077) | -0.070 (0.144) |
| N | 4629 | 2032 | 4629 | 2032 |

*Note*: Results are combined using 5 imputed data sets. Coefficients with standard errors clustered at the household-level shown in parentheses. All control variables in table 2, year-fixed effects, community-fixed effects, interaction between baseline social activities participation and time trend, and interaction between community dummy variables and time trend are included in each regression model.

*p < 0.1; **p < 0.05; ***p< 0.01

**Table S4 The migration-based heterogeneous effects of grandchild caregiving on social activity participation among female groups**

| Variables | Non-migrants | Migrants | Non-migrants | Migrants |
| --- | --- | --- | --- | --- |
|  | Model1 | Model2 | Model3 | Model4 |
| *Panel A: At least one activity* | | | | |
| Any care | 0.030 (0.030) | -0.003 (0.081) |  |  |
| Moderate care |  |  | 0.047 (0.032) | 0.015 (0.083) |
| Intensive care |  |  | 0.001 (0.037) | -0.038 (0.100) |
| *Panel B: Number of types of activities* | | | | |
| Any care | 0.083 (0.056) | 0.012 (0.102) |  |  |
| Moderate care |  |  | 0.101* (0.060) | 0.019 (0.109) |
| Intensive care |  |  | 0.050 (0.069) | -0.001 (0.120) |
| *Panel C: Frequency of participation* | | | | |
| Any care | 0.118 (0.082) | 0.062 (0.180) |  |  |
| Moderate care |  |  | 0.138 (0.088) | 0.119 (0.189) |
| Intensive care |  |  | 0.083 (0.099) | -0.046 (0.215) |
| N | 2,464 | 1,200 | 2,464 | 1,200 |

*Note*: Results are combined using 5 imputed data sets. All control variables in table 2, year-fixed effects, community-fixed effects, interaction between baseline social activities participation and time trend, and interaction between community dummy variables and time trend are included in each regression model.

*p < 0.1; **p < 0.05; ***p< 0.01

**Table S5 The migration-based heterogeneous effects of grandchild caregiving on social activity participation among male groups**

| Variables | Non-migrants | Migrants | Non-migrants | Migrants |
| --- | --- | --- | --- | --- |
|  | Model1 | Model2 | Model3 | Model4 |
| *Panel A: At least one activity* | | | | |
| Any care | -0.014 (0.033) | -0.132 (0.097) |  |  |
| Moderate care |  |  | -0.020 (0.035) | -0.156 (0.098) |
| Intensive care |  |  | -0.002 (0.045) | -0.074 (0.116) |
| *Panel B: Number of types of activities* | | | | |
| Any care | 0.085 (0.059) | -0.241 (0.177) |  |  |
| Moderate care |  |  | 0.076 (0.062) | -0.253 (0.188) |
| Intensive care |  |  | 0.104 (0.082) | -0.210 (0.198) |
| *Panel C: Frequency of participation* | | | | |
| Any care | 0.026 (0.088) | -0.042 (0.222) |  |  |
| Moderate care |  |  | -0.004 (0.093) | -0.029 (0.230) |
| Intensive care |  |  | 0.091 (0.119) | -0.074(0.282) |
| N | 2,165 | 832 | 2,165 | 832 |

*Note*: Results are combined using 5 imputed data sets. All control variables in table 2, year-fixed effects, community-fixed effects, interaction between baseline social activities participation and time trend, and interaction between community dummy variables and time trend are included in each regression model.

*p < 0.1; **p < 0.05; ***p< 0.01
